# Supplementary material for: Current and historic HIV-1 molecular epidemiology in paediatric and adult population from Kinshasa in the Democratic Republic of Congo
Source: PubMed Central journal article supplement (PMC7595211; doi:10.1038/s41598-020-74558-z), 2020-10-28
Supplement: 41598_2020_74558_MOESM1_ESM.pdf [file 41598_2020_74558_MOESM1_ESM.pdf]

**CURRENT AND HISTORIC HIV-1 MOLECULAR EPIDEMIOLOGY IN PAEDIATRIC AND ADULT POPULATION FROM KINSHASA IN THE DEMOCRATIC REPUBLIC OF CONGO**

Marina Rubio-Garrido<sup>1\*</sup>, José María González-Alba<sup>2\*</sup>, Gabriel Reina<sup>3#</sup>, Adolphe Ndarabu<sup>4</sup>, David Barquín<sup>3</sup>, Silvia Carlos<sup>5</sup>, Juan Carlos Galán<sup>2</sup> and África Holguín<sup>1#</sup>.

<sup>1</sup> HIV-1 Molecular Epidemiology Laboratory, Microbiology and Parasitology Department, Hospital Ramón y Cajal-IRYCIS and CIBEREsp-RITIP, Madrid (28034), Spain.

<sup>2</sup> Virology Section, Microbiology and Parasitology Department, Hospital Ramón y Cajal-IRYCIS and CIBEREsp, Madrid (28034), Spain.

<sup>3</sup> Microbiology Department, Clínica Universidad de Navarra. Navarra Institute for Health Research (IdiSNA). Institute of Tropical Health, Universidad de Navarra (ISTUN), Pamplona (31008), Spain.

<sup>4</sup> Monkole Hospital, Kinshasa, the Democratic Republic of Congo.

<sup>5</sup> Department of Preventive Medicine and Public Health, Universidad de Navarra, Pamplona (31008), Spain. Navarra Institute for Health Research (IdiSNA). Institute of Tropical Health, Universidad de Navarra (ISTUN), Pamplona (31008), Spain.

\* These authors contributed equally to this work. Author order was determined because this study belongs to the project of Rubio-Garrido M and González JM is a collaborator.

#Corresponding authors:

- Gabriel Reina  
E-mail: [gabi@unav.es](mailto:gabi@unav.es)  
Tel. 948 255 400 ext. 5103  
Avda. Pio XII, 36. 31008 Pamplona (Spain)
  
- África Holguín  
Email: [africa.holguin@salud.madrid.org](mailto:africa.holguin@salud.madrid.org)  
Tel. 913 368 153  
Ctra. Colmenar Viejo Km 9,100. 28034 Madrid (Spain)

Supplementary Fig 1. Phylogenetic tree including 66 *pol* sequences ascribed to pure subtypes at *pol* from recently collected DBS from Kinshasa and 5,672 reference LANL sequences.

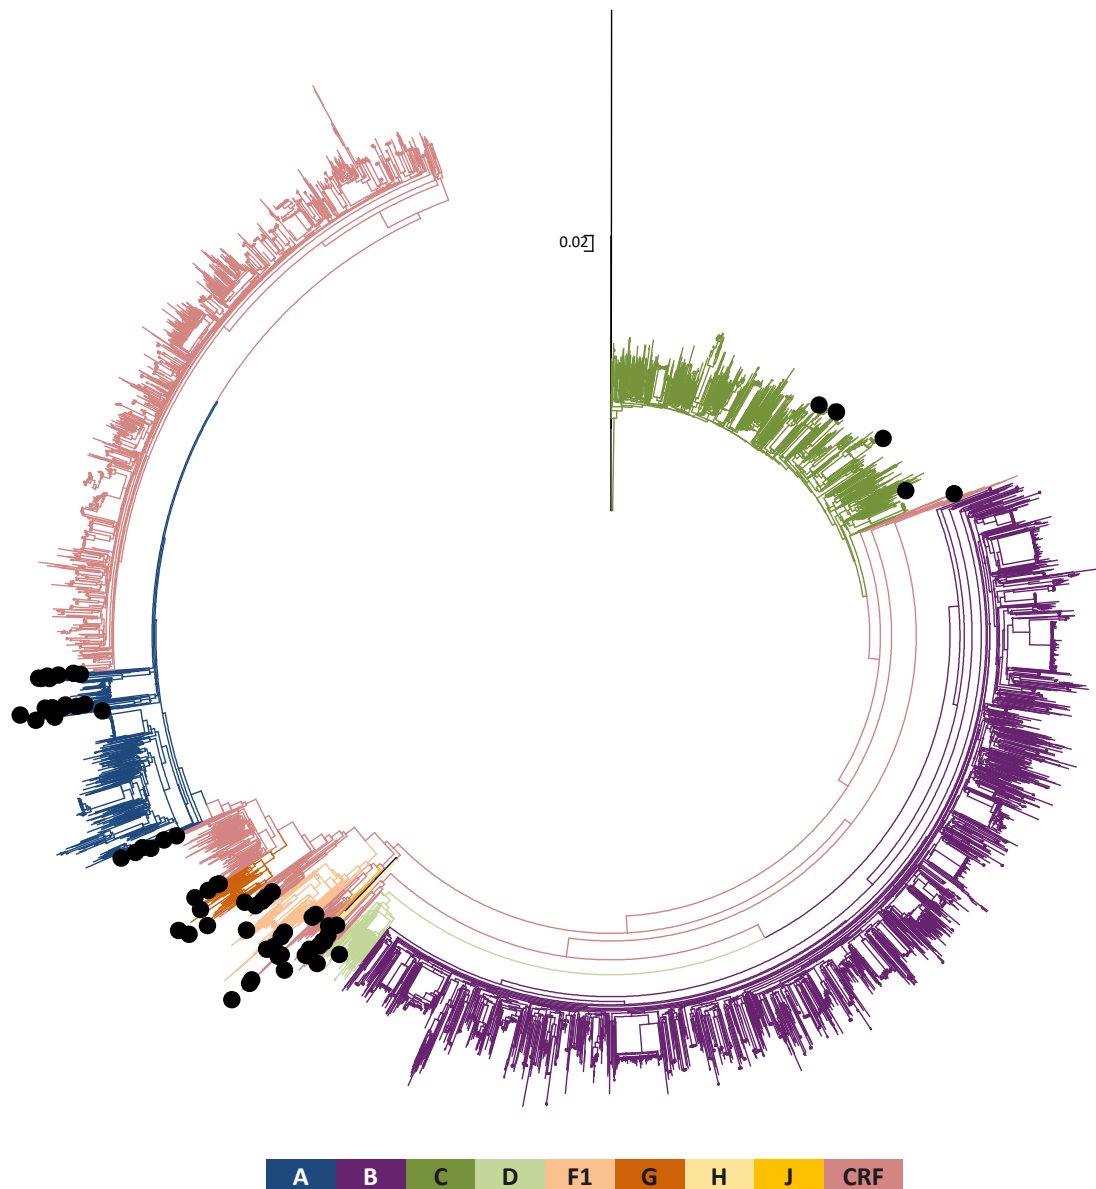

**Supplementary Figure 1.** Phylogenetic tree using partial *pol* sequences (1,127 nts) reconstructed by maximum-likelihood method with RAxML v8.0 using the general time reversible plus proportion of invariable sites plus gamma distribution parameter evolutionary model (GTR+I+G) generated with MEGA6 software (<https://www.megasoftware.net/>), as reported in method section. Only coloured subtypes are showed. Circles mark our 66 samples ascribed to pure HIV-1 subtypes at *pol* recently collected from Kinshasa (2016-2018). In blue, subtype A and sub-subtypes A1-A6.

Supplementary Figure 2. Transmission cluster number 1 identified by maximum-likelihood tree and GTR+I+G evolutionary model involving one child, one adolescent, and one woman in Kinshasa.

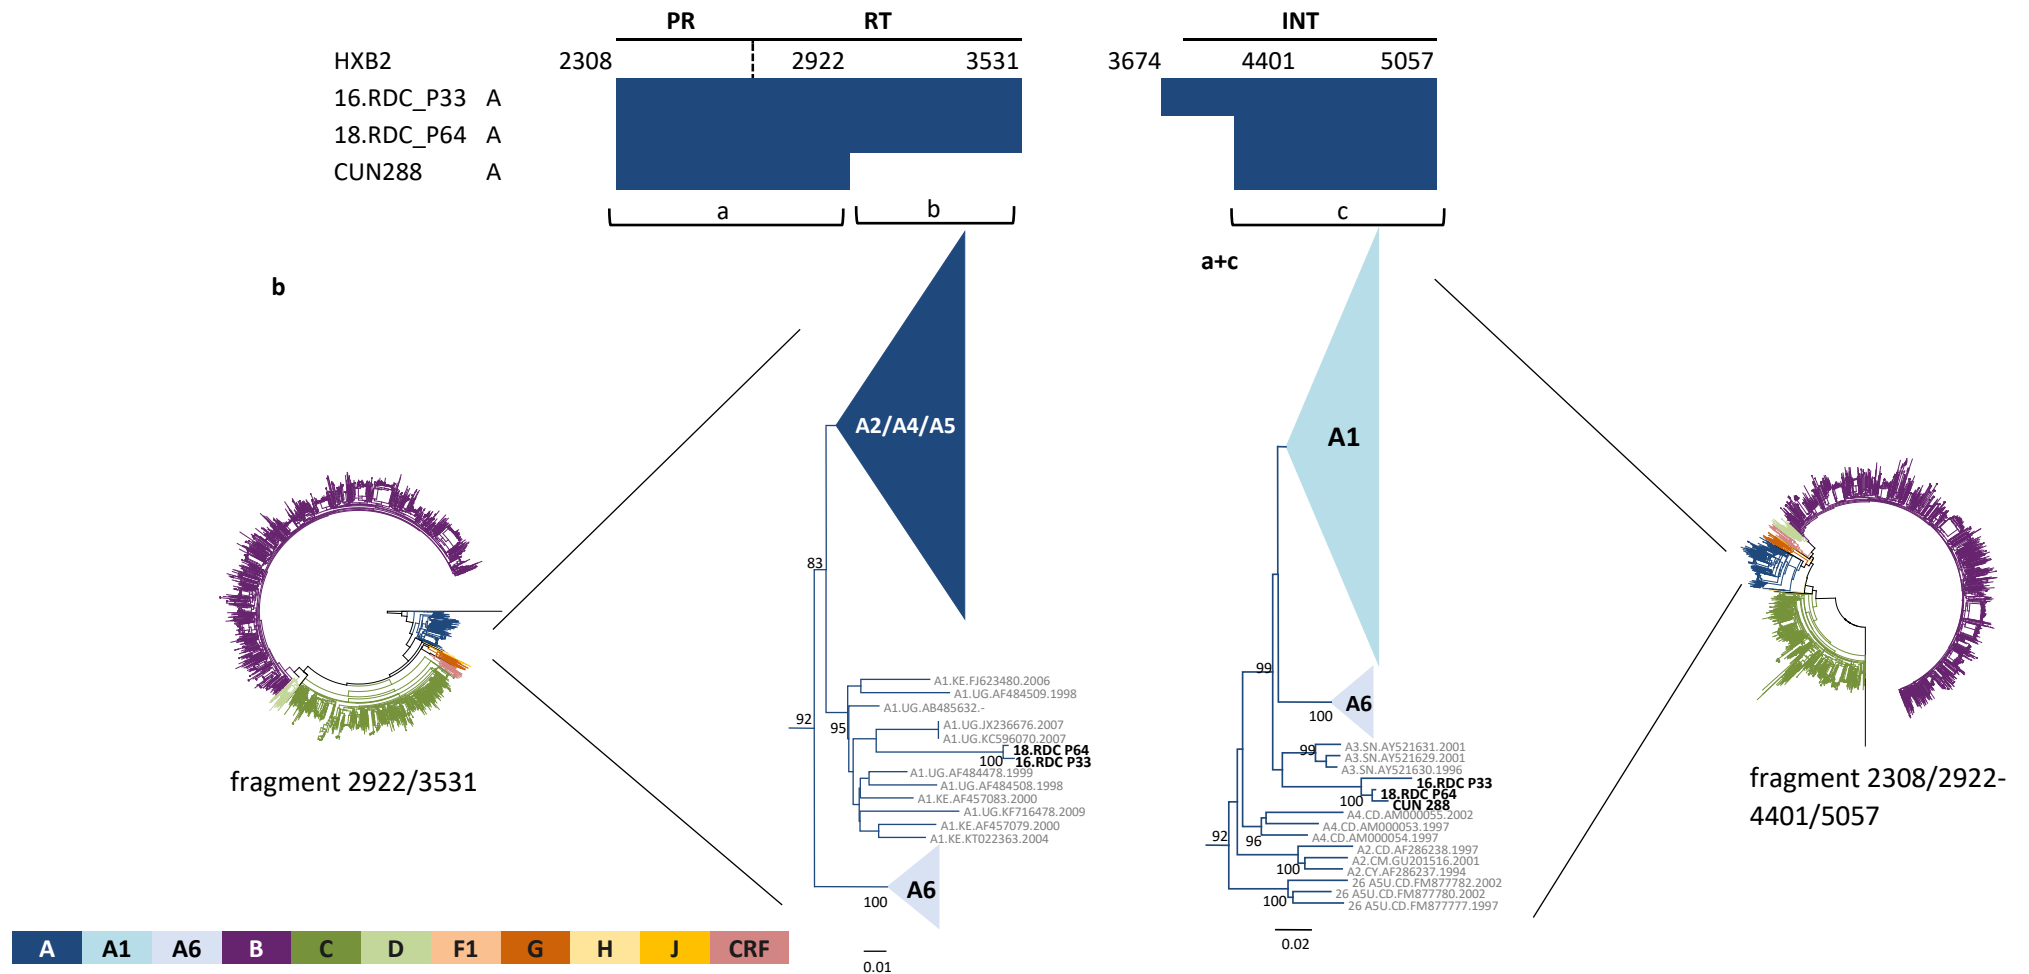

**Legend Supplementary Figure 2.** PhyML trees using partial *pol* sequence from 3 patients belonging to transmission cluster 1 including 4,090 *pol* reference sequences from DRC deposited in LANL assigned to HIV-1 pure subtypes. The figure was generated with MEGA6 software (<https://www.megasoftware.net/>). Epidemiological known data of subjects are reported in **Table 2**.

Supplementary Figure 3. Transmission cluster number 2 identified by maximum-likelihood tree and GTR+I+G evolutionary model involving two adults in Kinshasa.

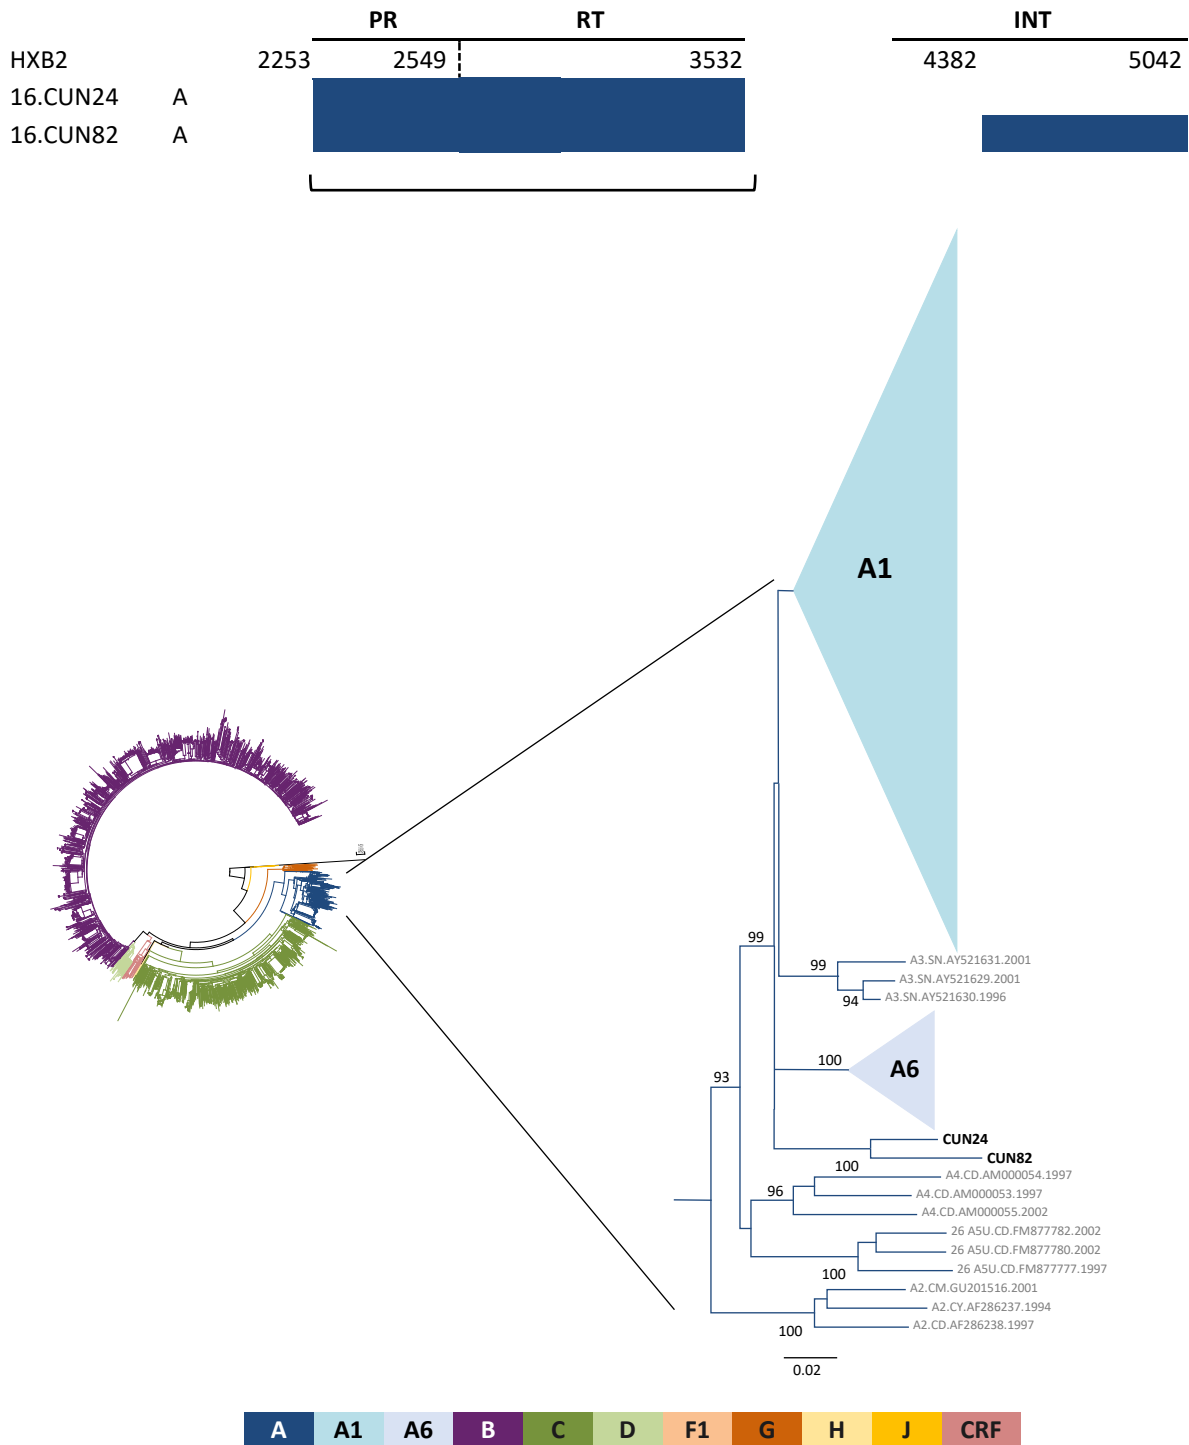

Legend Supplementary Figure 3. PhyML tree using partial *pol* sequence (1,279 nt) from patients CUN24 and CUN82 (transmission cluster 2) including 4,090 *pol* reference LANL sequences from DRC ascribed to HIV-1 pure subtypes. The figure was generated with MEGA6 software (<https://www.megasoftware.net/>). Epidemiological known data of subjects are reported in Table 2.

Supplementary Figure 4. Transmission cluster number 3 identified by maximum-likelihood tree and GTR+I+G evolutionary model involving two adults in Kinshasa.

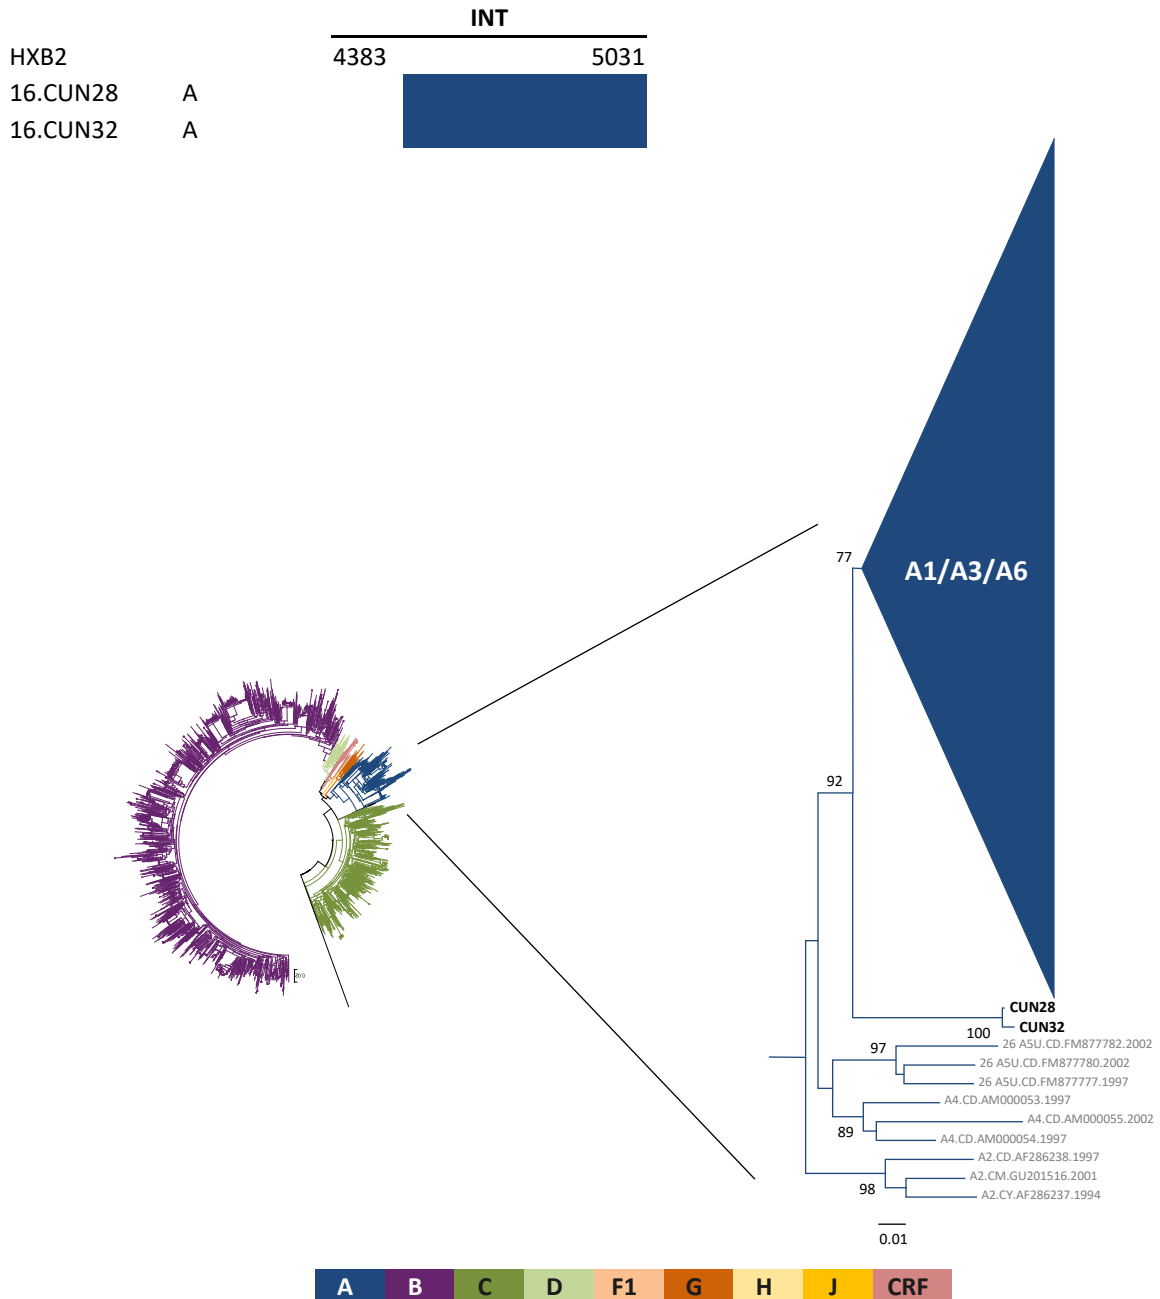

**Legend Supplementary Figure 4.** PhyML tree using partial *pol* sequence (648nt) from patients CUN28 and CUN32 (transmission cluster 3) including 4,090 *pol* reference LANL sequences from the DRC assigned to HIV-1 pure subtypes. The figure was generated with MEGA6 software (<https://www.megasoftware.net/>). Epidemiological known data of subjects are reported in Table 2.

Supplementary Figure 5. Transmission cluster number 4 identified by maximum-likelihood tree and GTR+I+G evolutionary model involving two children in Kinshasa carrying subtype H sequences at *pol*.

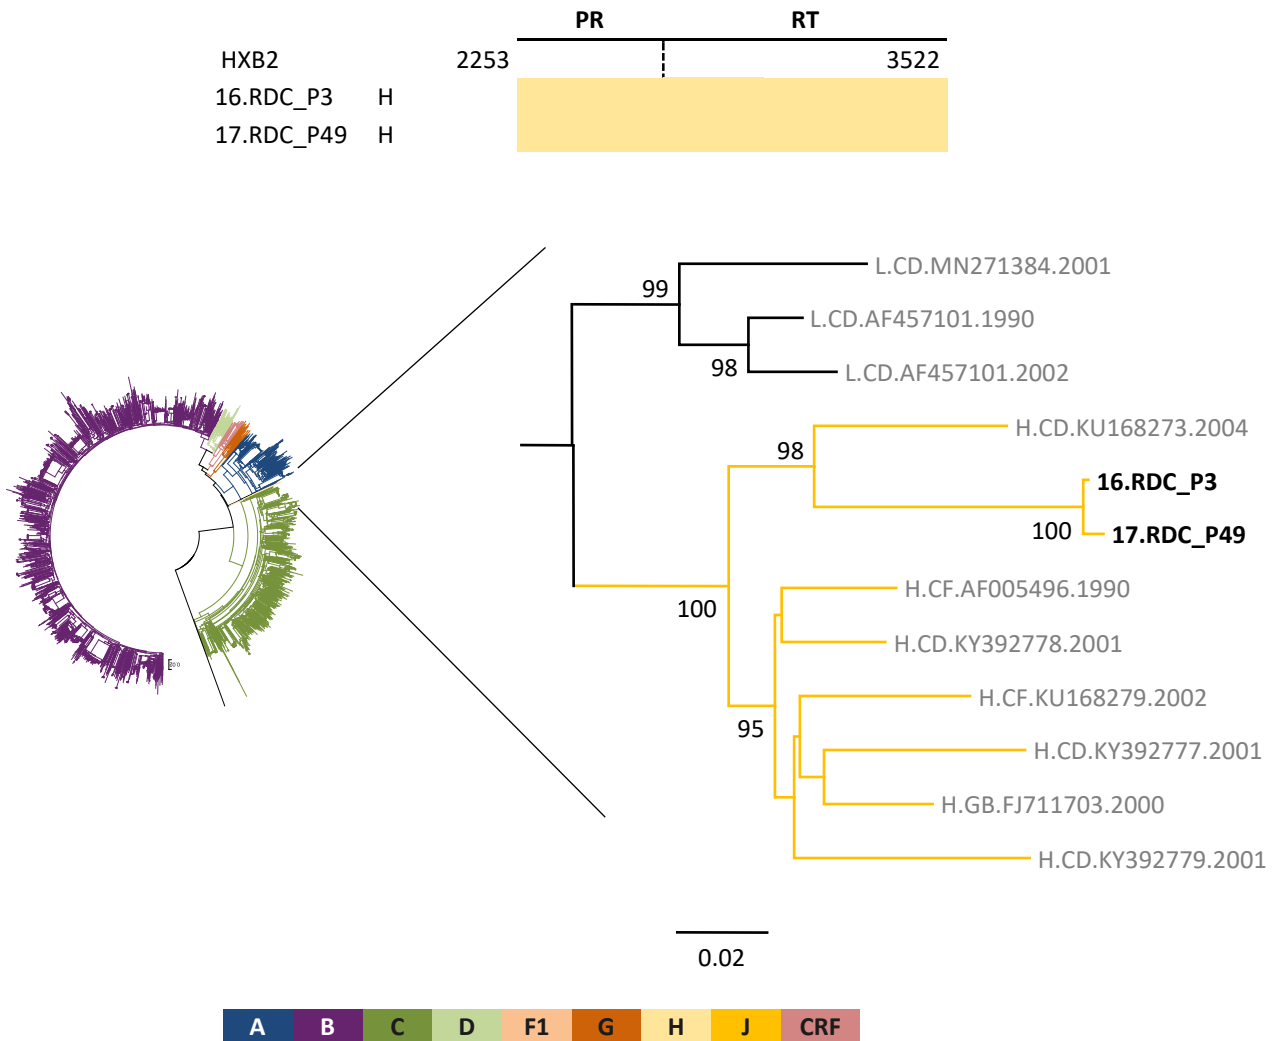

**Legend Supplementary Figure 5.** PhyML tree using partial *pol* sequence (1,269 nt) from 2 children included in transmission cluster 4 including 4,090 *pol* reference LANL sequences from the DRC assigned to HIV-1 pure subtypes. The figure was generated with MEGA6 software (<https://www.megasoftware.net/>). Epidemiological known data of subjects are reported in **Table 2**.

Supplementary Figure 6. Recombination transmission net from 17 involved paediatric patients from Kinshasa during 2016-2018.

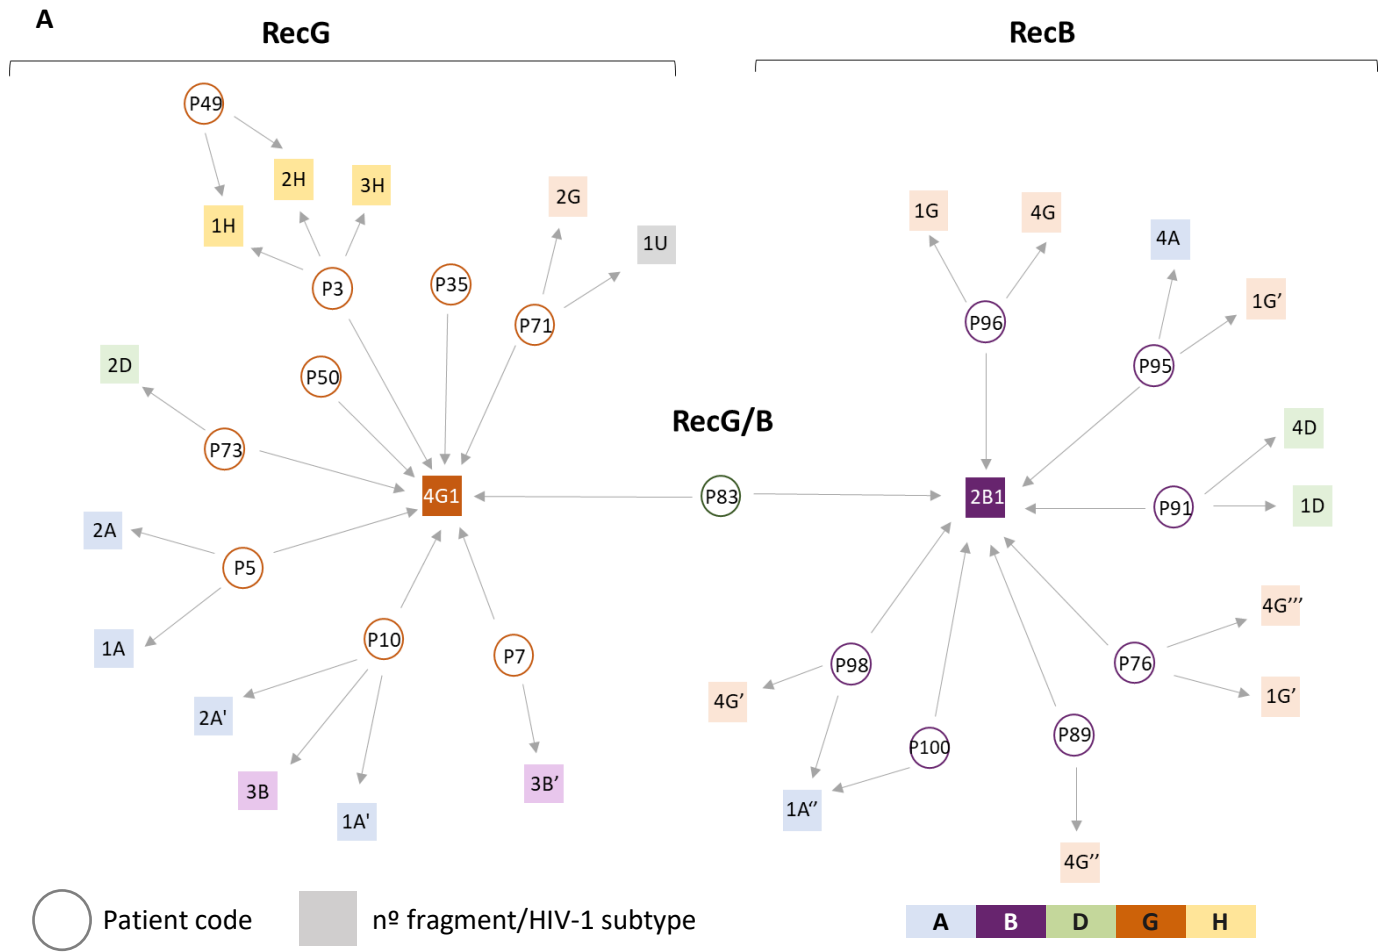

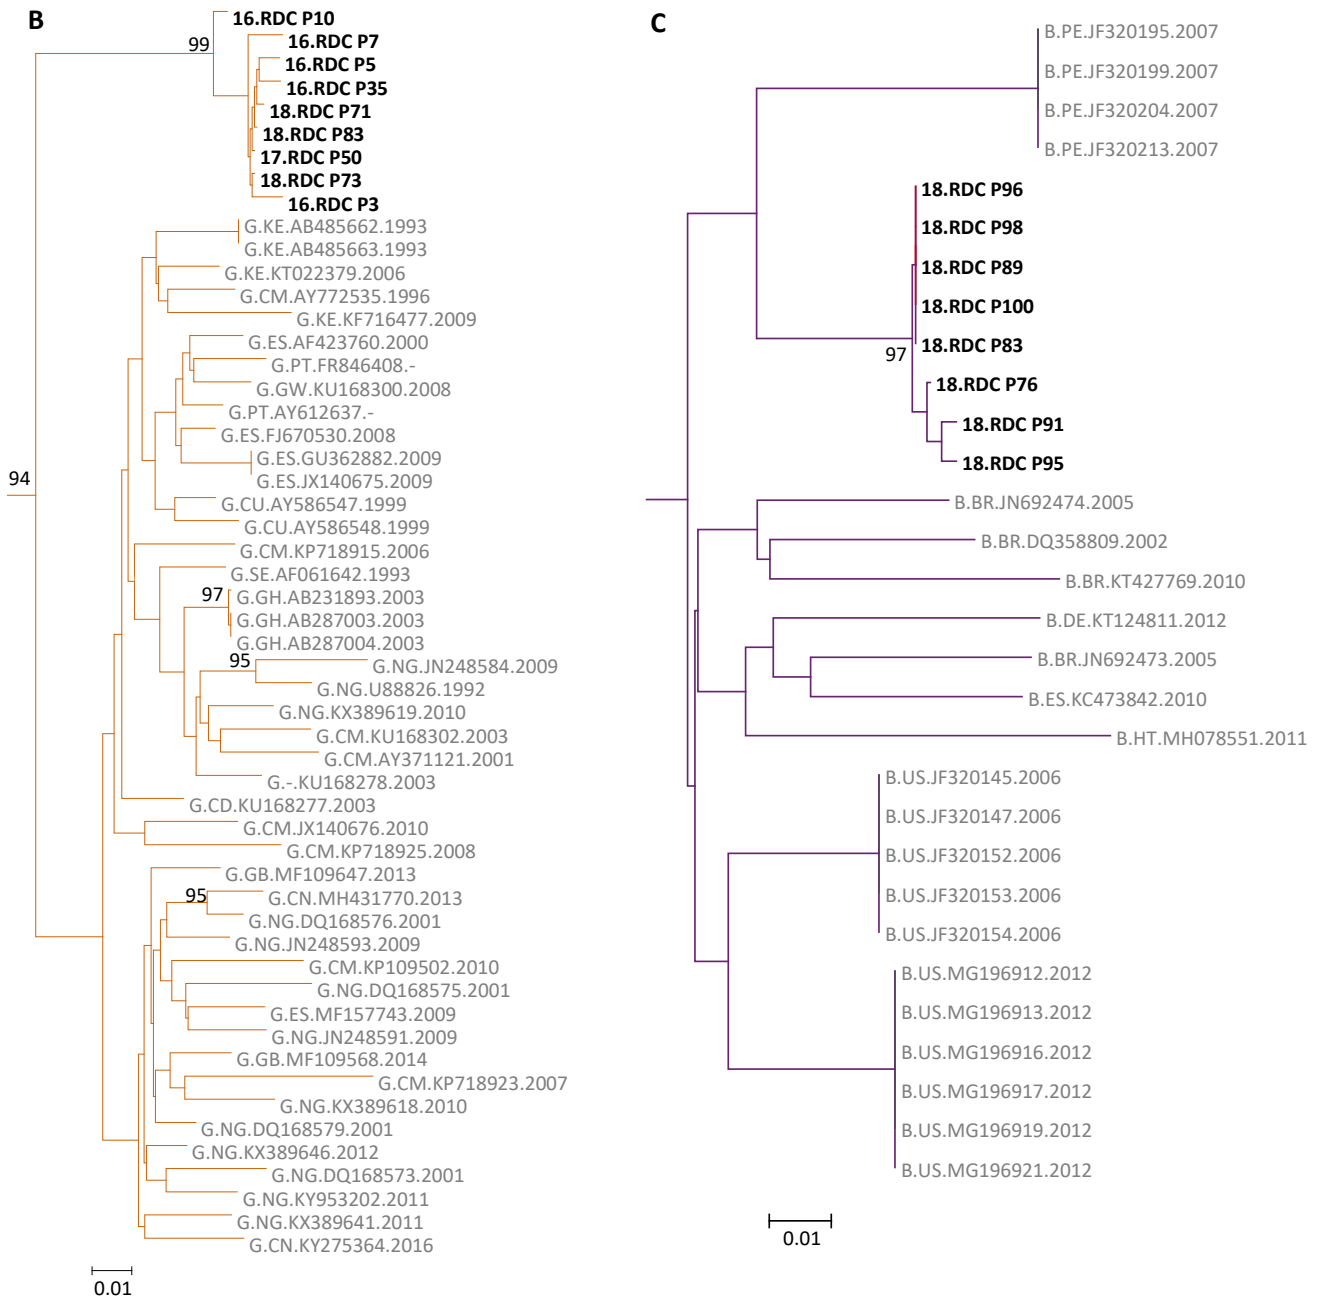

**Legend Supplementary Figure 6. A.** Recombination transmission net. **B.** PhyML tree of RecG, using partial *pol* sequence (615 nt, HXB2 4390-5005) from 9 children and adolescents including 4,090 *pol* reference LANL sequences from DRC ascribed to HIV-1 pure subtypes. **C.** PhyML tree of RecB, using partial *pol* sequence (599 nt, HXB2 2935-3534) from 8 children and adolescents including 4,090 *pol* reference LANL sequences from DRC ascribed to HIV-1 pure subtypes. Coloured circles, patient's *pol* sequences involved in recombination networks sharing *pol* subtype G (RecG) or/and B (RecB) fragments supported by bootstrap values >80% in PhyML trees. In coloured squares, numbers refer to analyzed *pol* fragment (numbering according to HXB2): 1, positions 2253-2934 (in protease); 2, positions 2935-3534 (in retrotranscriptase); 3, positions 3704-4389 (in retrotranscriptase); 4, positions 4390-5005 (in integrase). Letters refer to HIV-1 variant: A, subtype A; B, subtype B; D, subtype D; G, subtype G; H, subtype H; U, unknown. To distinguish the fragments of the same subtype that do not belong to the same ancestor, a super index is added. The figure was generated with MEGA6 software (<https://www.megasoftware.net/>). Epidemiological known data of subjects are reported in **Table 3**.



Revised SUPPLEMENTARY MATERIAL manuscript ID 8730254b-dd82-4933-aed4-37194a3f2f0c

Supplementary Figure 7. Recombination event identified by maximum-likelihood (PhyML) tree and GTR+I+G evolutionary model involving viruses from 3 adult patients from Kinshasa.

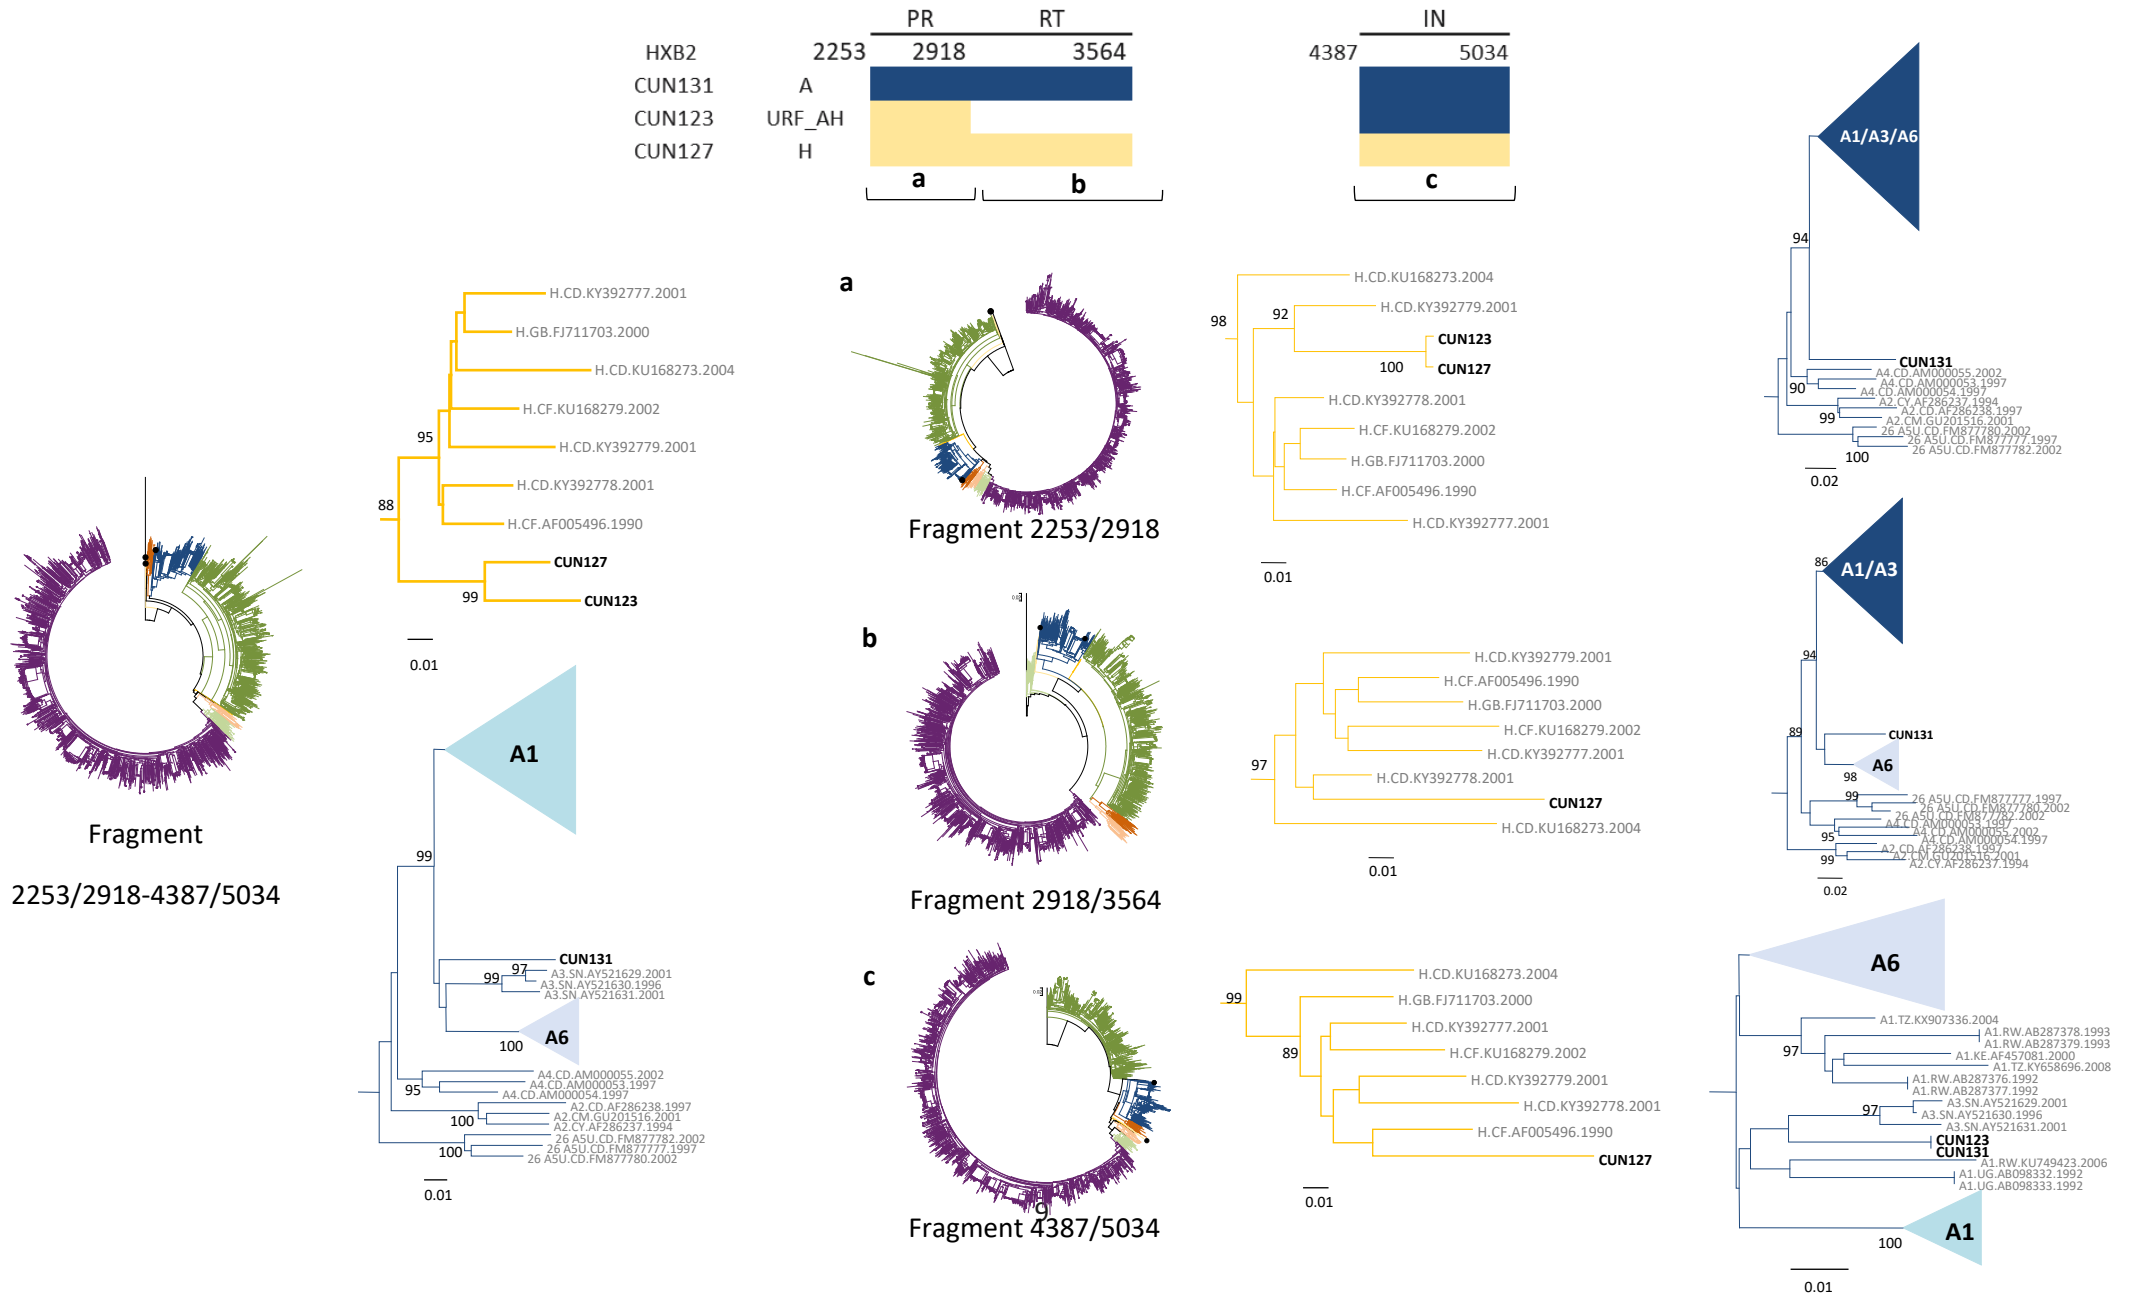

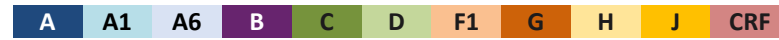

**Legend Supplementary Figure 7.** PhyML tree using partial *pol* sequence (1,312 nt) from 3 adults including 4,090 *pol* reference LANL sequences from DRC ascribed to HIV-1 pure subtypes. The figure was generated with MEGA6 software (<https://www.megasoftware.net/>).

Supplementary Table 1. Summary of publications identifying HIV-1 variants in the DRC.

| Study                      | DRC locations                               | Sampling year     | Sample type            | Population group                                         | Subtyping method | No. seq  | HIV genetic regions                         | Sequence submission to GenBank |
|----------------------------|---------------------------------------------|-------------------|------------------------|----------------------------------------------------------|------------------|----------|---------------------------------------------|--------------------------------|
| Potts 1993 <sup>34</sup>   | Kinshasa                                    | -                 | PBMC                   | Pregnant woman                                           | Phy              | 14       | <i>env (C2V3)</i>                           | No                             |
| Mokili 1999 <sup>35</sup>  | Kimpese                                     | 1988-1994         | Blood, plasma and PBMC | Mothers and children                                     | Phy              | 66       | <i>gag (p17)</i>                            | No                             |
| Vidal 2000A <sup>24</sup>  | Kinshasa, Bwamanda, Mbuyi-Maya              | 1997              | PBMC                   | Sex worker, TB patients, pregnant women and blood donors | Phy              | 247      | <i>env (V3-V5, gp160), gag (p24)</i>        | Yes                            |
| Vidal 2000B <sup>38</sup>  | Kinshasa                                    | 1997              | PBMC                   | TB patient<br>Pregnant woman                             | Phy              | 2        | <i>near-full-length genome</i>              | Yes                            |
| Triques 2000 <sup>37</sup> | -                                           | -                 | -                      | -                                                        | Phy              | 1        | <i>near-full-length genome</i>              | Yes                            |
| Yang 2001 <sup>40</sup>    | Kinshasa                                    | 1985              | plasma                 | Female sex workers                                       | Phy              | 24       | <i>gag (p24), env (C2V3, gp41)</i>          | Yes                            |
| Gao 2001 <sup>41</sup>     | Kinshasa                                    | 1983              | PBMC                   | AIDS patients                                            | Phy              | 1        | <i>gag, pol, env, nef</i>                   | Yes                            |
| Mokili 2002 <sup>36</sup>  | Kinshasa, Kimpese                           | 1983<br>1990      | PBMC                   | AIDS patient<br>12-month-old baby                        | Phy              | 2        | <i>full genome</i>                          | Yes                            |
| Kita 2004 <sup>42</sup>    | Likasi                                      | 2001              | PBMC                   | -                                                        | Phy              | 24       | <i>pol (IN), env (C2V3, gp41)</i>           | Yes                            |
| Yang 2005 <sup>39</sup>    | Kinshasa                                    | 1985<br>1999-2000 | plasma                 | Female sex workers<br>STI and TB patients                | Phy              | 24<br>83 | <i>gag (p24)</i><br><i>env (C2V3, gp41)</i> | Yes                            |
| Vidal 2005 <sup>43</sup>   | Kinshasa, Mbuji-Mayi, Lubumbashi, Kisangani | 2002              | PBMC                   | -                                                        | Phy              | 288      | <i>env (V3-V5)</i>                          | Yes                            |
| Vidal 2006A <sup>44</sup>  | Kinshasa, Mbuji-Mayi, Lubumbashi, Kisangani | 2002              | PBMC                   | Sentinel population                                      | Phy              | 70       | <i>pol (PR,RT), env (V3-V5)</i>             | Yes                            |
| Vidal 2006B <sup>45</sup>  | Kinshasa                                    | 1997<br>2002      | PBMC                   | TB patients                                              | Phy              | 3        | <i>near-full-length genome</i>              | Yes                            |
| Worobey 2008 <sup>1</sup>  | Kinshasa                                    | 1960              | lymph node biopsy      | Adult female                                             | Phy              | 1        | <i>gag, pol, env (small fragments)</i>      | Yes                            |
| Vidal 2008 <sup>46</sup>   | Lubumbashi                                  | 2002              | PBMC                   | -                                                        | Phy              | 1        | <i>near-full-length genome</i>              | Yes*                           |
| Vidal 2009 <sup>47</sup>   | Kinshasa, Mbuyi-Mayi, Lumbumbasi            | 1997<br>2002      | PBMC                   | STI, ANC, AIDS, and TB patients                          | Phy              | 8        | <i>near-full-length genome</i>              | Yes                            |

| Study                            | Settings in DRC                                                                                     | Sampling year    | Sample type   | Population group                           | Subtyping method             | No. seq    | HIV genetic regions                            | Sequence submission to GenBank |
|----------------------------------|-----------------------------------------------------------------------------------------------------|------------------|---------------|--------------------------------------------|------------------------------|------------|------------------------------------------------|--------------------------------|
| Niama 2009 <sup>48</sup>         | -                                                                                                   | 1997             | PBMC          | -                                          | Phy.                         | 2          | <i>full-length genome</i>                      | Yes*                           |
| Huang 2009 <sup>49</sup>         | -                                                                                                   | 1996             | PBMC          | Asymptomatic patients                      | Phy                          | 2          | <i>full-length genome</i>                      | Yes                            |
| Djoko 2011 <sup>50</sup>         | Kinshasa                                                                                            | 2007             | plasma        | Military personnel                         | Phy                          | 94         | <i>pol (PR, RT)</i>                            | Yes                            |
| Muwonga 2011 <sup>51</sup>       | Kinshasa, Matadi, Lubumbashi, Mbuji-Mayi                                                            | 2008             | plasma        | ART-treated patients<br>ART-naive patients | Phy                          | 93         | <i>pol (PR, RT)</i>                            | Yes                            |
| Kamangu 2015 <sup>52</sup>       | Kinshasa                                                                                            | 2013-2014        | plasma        | ART-naive patients                         | Online subtyping tools       | 153        | <i>pol (PR, RT)</i>                            | No                             |
| Boillot 2016 <sup>53</sup>       | Nord Kivu                                                                                           | 2011-2012        | DBS           | ART-treated patients                       | Phy                          | 55         | <i>pol (PR, RT)</i>                            | Yes                            |
| Rodgers 2017 <sup>29</sup>       | Bandundu, Kananga                                                                                   | 2001-2003        | plasma        | voluntary pregnant women                   | Online subtyping tools + Phy | 172<br>14  | <i>env (gp41)</i><br><i>full-length genome</i> | Yes                            |
| Villabona 2017 <sup>54</sup>     | Kinshasa, Mbuyi Mayi, Nord-Kivu                                                                     | 2008<br>2012     | DBS or plasma | -                                          | Phy                          | 8          | <i>full-length genome</i>                      | Yes                            |
| Faria 2019 <sup>28</sup>         | Kinshasa, Matadi, Mbuji-Mayi and Lubumbashi                                                         | 2008             | plasma        | ART-treated patients                       | Phy                          | 346        | <i>pol (PR, RT)</i>                            | Yes                            |
| Rubio-Garrido 2019 <sup>55</sup> | Kinshasa                                                                                            | 2016             | DBS           | Children and adults                        | Phy                          | 58         | <i>pol (PR, RT, IN)</i>                        | Yes                            |
| Yamaguchi 2020 <sup>10</sup>     | Kananga                                                                                             | 2001             | plasma        | -                                          | Phy                          | 1          | <i>full-length genome</i>                      | Yes                            |
| Kwon 2020 <sup>56</sup>          | Kinshasa, Bukavu, Goma, Kananga, Kindu, Kikwit, Kisangani, Matadi, Lubumbashi, Mbandaka, Mbuji-Mayi | 2012             | DBS           | Female sex workers                         | Online subtyping tools + Phy | 60<br>145  | <i>pol (PR, RT)</i><br><i>env (C2, V4)</i>     | Yes                            |
| <b>Current study</b>             | <b>Kinshasa</b>                                                                                     | <b>2016-2018</b> | <b>DBS</b>    | <b>Children, adolescents and adults</b>    | <b>Phy</b>                   | <b>165</b> | <b><i>pol (PR, RT, IN)</i></b>                 | <b>Yes</b>                     |

**Legend Supplementary Table 1.** DRC, Democratic Republic of the Congo; DBS, dried blood spots; DPS, dried plasma spots; Dashes, unknown data; STI, sexually transmitted infection; ANC, antenatal clinic attendee; TB, tuberculosis; ART, antiretroviral therapy; AIDS; acquired immunodeficiency syndrome, PBMC, peripheral blood mononuclear cells; Phy, phylogenetic analysis of viral sequences; No, number; PR, protease; RT; retrotranscriptase; IN, integrase. GenBank, GenBank sequence database

(<https://www.ncbi.nlm.nih.gov/genbank/>); EMBL, EMBL Nucleotide Sequence Database (<http://www.ebi.ac.uk/embl/>). \*Most papers submitted sequences to GenBank and 2 to EMBL database (with asterisks). The numbers in superindex indicate the reference of each article.
